# Supplementary material for: Structural analysis and evolution of specificity of the SUMO UFD E1-E2 interactions
Source: PubMed Central journal article supplement (PMC5292753; doi:10.1038/srep41998), 2017-02-06
Supplement: srep41998-s1.pdf [file srep41998-s1.pdf]

# **Structural analysis and evolution of specificity of the SUMO UFD E1-E2 interactions**

Bing Liu<sup>1</sup>, L. Maria Lois<sup>2\*</sup> and David Reverter<sup>1\*</sup>

<sup>1</sup>Institut de Biotecnologia i de Biomedicina and Departamento de Bioquímica i Biologia Molecular, Universitat Autònoma de Barcelona, 08193 Barcelona, Bellaterra, Spain.

<sup>2</sup>Center for Research in Agricultural Genomics-CRAG. Edifici CRAG-Campus UAB, Bellaterra 08193 Barcelona, Spain

\*To whom the correspondence should be addressed: David Reverter, Universitat Autònoma de Barcelona, 08193 Bellaterra, Barcelona, Spain, Ph: +34 93 5868955, FAX: (93)5812011, E-mail: david.reverter@uab.cat and L. Maria Lois, Center for Research in Agricultural Genomics-CRAG, 08193 Bellaterra, Barcelona, Spain, Ph: +34 93 5636600 ext.3215, Fax. +34 93 5636601, email: maria.lois@cragenomica.es.

## Supplementary Information

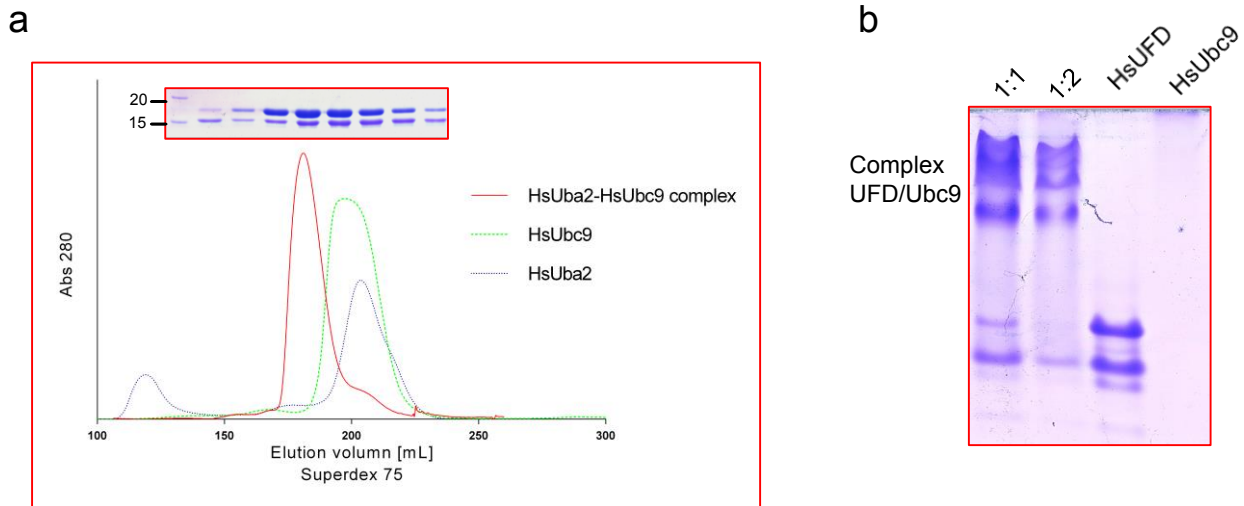

### Supplementary Figure S1. Purification of the complex between human E1 UFD domain and Ubc9.

(a) Size exclusion chromatography profiles of human Ubc9, human E1 UFD domain and the complex with a buffer containing 100mM NaCl, 20mM Tris 8, 1mM BME. Inset, SDS-PAGE of the peak fractions.

(b) Native gel electrophoresis of the complex formation between human UFD domain and human Ubc.

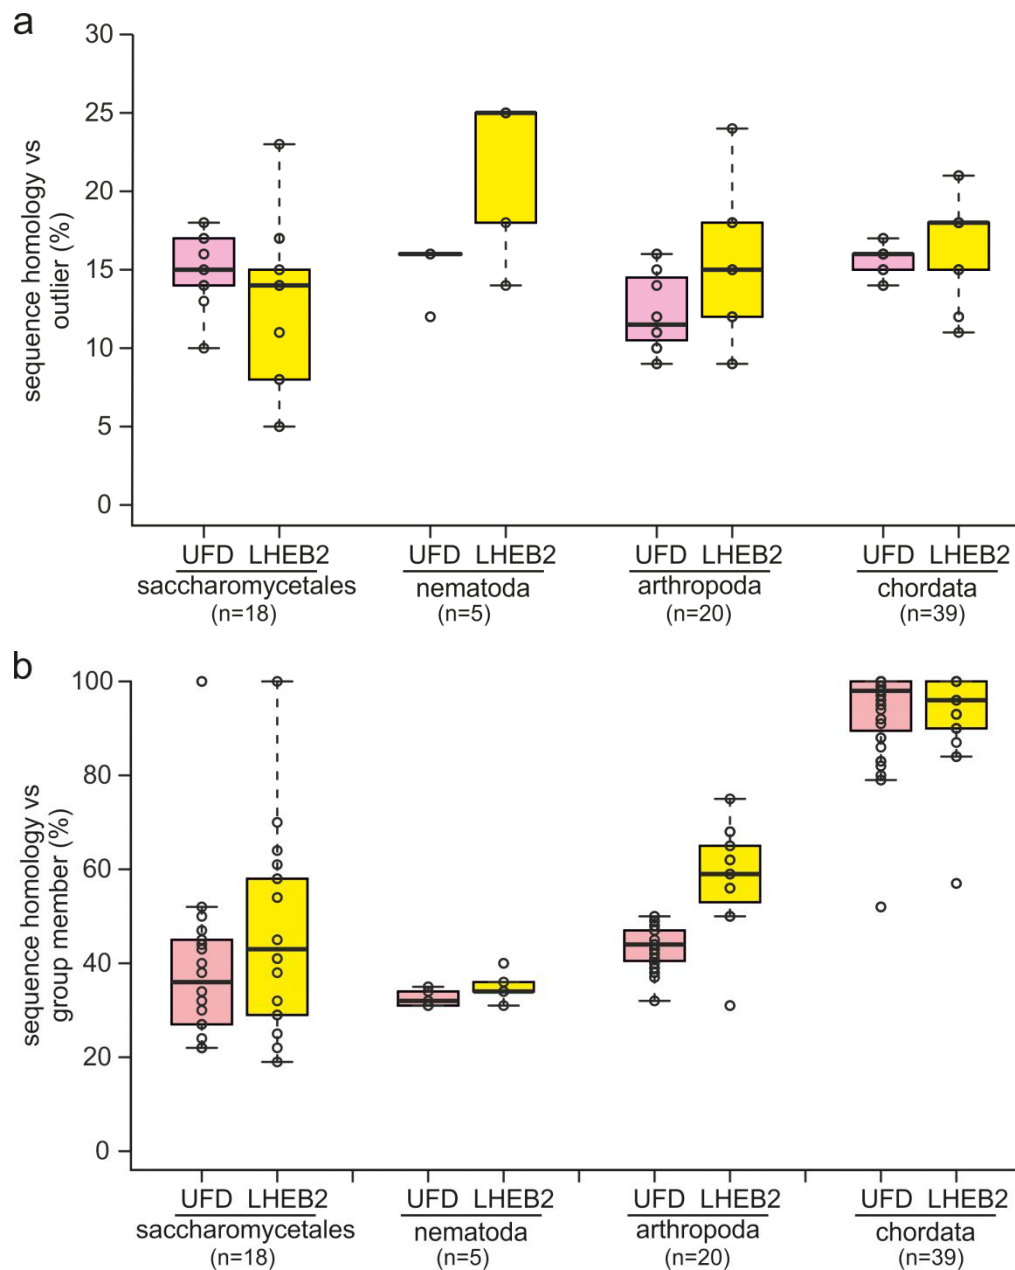

**Supplementary Figure S2. Analysis of pair homology distribution between UFD or LHEB2 sequences within each phylogenetic group analyzed.** (a) Distribution of identity percentage of UFD (pink boxes) or LHEB2 (yellow boxes) domains between each sequence in the analyzed group and an outlier sequence (human, in the case of saccharomycetales, and yeast, in the case of nematoda, arthropoda and chordata). (b) Distribution identity percentage of UFD (pink boxes) or LHEB2 (yellow boxes) domains between each sequence in the analyzed group and a sequence from the same group (yeast, in the case of saccharomycetales, and human, in the case of nematoda, arthropoda and chordata). Center lines show the medians; box limits indicate the 25th and 75th percentiles as determined by R software; whiskers extend 1.5 times the interquartile range from the 25th and 75th percentiles, outliers are represented by dots; data points are plotted as open circles.

\* 20 \* 40 \* 60 \* 80 \*
Api : CNVCS--KGE-IVFVDMHNFVROEELV--LKKKLNVAPDVTMLD---RVLTISSEDETGDVD-MYDMTISEA-GMTNCGSFDADD : 79
Cbri : CYVCS--TKE-VFLYVNLAEMLSGLCEKV--LKQELNLAADPAI--ESNTNSIVLSDGEMDP-LMSKLAEL-SMDGAILACDDF : 80
Cbr : CFCAD---VRS-VFLYVNPDEMVGGLCEKV--LKQELNLAADPAI--GGTFNMIISDPEDKMDEMLT-KISEV-SDNCAILACDDY : 82
Cre : CYVCS--TRE-VFIYVNPDEMVGALRDKV--LMQELNLAADPAI--TNTANVVLSDGEMDP-LMSKLAEL-SMDGAILACDDY : 80
Cel : CFVCS--KRE-VFIYVNPDEMVGGLCEKV--LKQELNLAADPAI--SATSRIIVSDGEMDP-LMSKLAEL-SMDGAILACDDY : 80
Cjap : CYVCS--TRE-VFIYVNPDEMVGGLCEKV--LKQELNLAADPAI--NASSRIIVSDGEMDP-LMSKLAEL-SMDGAILACDDY : 80
Sma : CLVCS--LHLLCAPELLLRILRDRILIRHLGLAPDVEV--PDRGIIISSEDEDEETLNLTADFLKLTHTCLQCDDF : 85
Cin : CYVCS--KPE-ITLKLNTKTLCEQFRDKI--LKSHLGLAPDVEIL--GRGTLISSEDEEENQSLGQTLDSFNTHCSRRAADF : 83
Dpu : CYVCS--QPE-VTVLLNVSQMVQSFEKV--LRGALHISPDVMD--GKGTILISSEGETE-NMPLTISDF-NVSDCSRRCEDF : 82
Hma : CFCAK---KPE-VTIFLNLQTVVKQLEDKI--LKDKLCLVAPDVEID--GKGTILISSEGETE-NMPLTISDF-NVSDCSRRCEDF : 82
Aqu : CYVCS--CPE-ASVKNLNTNSTIATLRDKI--IIGHFGIAPDVEID--GKGTILISSEGETE-NMPLTISDF-NVSDCSRRCEDF : 82
Nve : CYVCS--KPE-VTVVFNVTETMIOALEEKV--LKERFGLVAPDVEID--GKGTILISSEGETE-NMPLTISDF-NVSDCSRRCEDF : 83
Lcha : CYVCS--KPE-VTVKLVNHSKVLQTLQDKI--LKEKFAVAPDVOIE--GKGTILISSEGETE-NMPLTISDF-NVSDCSRRCEDF : 82
Aca : CYVCS--KPE-VTVKLVNHSKVLQTLQDKI--LKEKFAVAPDVOIE--GKGTILISSEGETE-NMPLTISDF-NVSDCSRRCEDF : 82
Tga a : CYVCS--KPE-VTVKLVNHSKVLQTLQDKI--LKEKFAVAPDVOIE--GKGTILISSEGETE-NMPLTISDF-NVSDCSRRCEDF : 82
Mlu b : CFCAS---KPE-VTVVRLNVHKKVVLTLQDKI--VKEKFAVAPDVOIE--GKGTILISSEGETE-NMPLTISDF-NVSDCSRRCEDF : 82
Oan : CYVCS--KPE-VTVVRLNVHKKVVLTLQDKI--VKEKFAVAPDVOIE--GKGTILISSEGETE-NMPLTISDF-NVSDCSRRCEDF : 82
Pca : CYVCS--KPE-VTVVRLNVHKKVVLTLQDKI--VKEKFAVAPDVOIE--GKGTILISSEGETE-NMPLTISDF-NVSDCSRRCEDF : 82
Mmus : CYVCS--KPE-VTVVRLNVHKKVVLTLQDKI--VKEKFAVAPDVOIE--GKGTILISSEGETE-NMPLTISDF-NVSDCSRRCEDF : 82
Rno : CYVCS--KPE-VTVVRLNVHKKVVLTLQDKI--VKEKFAVAPDVOIE--GKGTILISSEGETE-NMPLTISDF-NVSDCSRRCEDF : 82
Itr : CYVCS--KPE-VTVVRLNVHKKVVLTLQDKI--VKEKFAVAPDVOIE--GKGTILISSEGETE-NMPLTISDF-NVSDCSRRCEDF : 82
Oga : CYVCS--KPE-VTVVRLNVHKKVVLTLQDKI--VKEKFAVAPDVOIE--GKGTILISSEGETE-NMPLTISDF-NVSDCSRRCEDF : 82
Laf a : CYVCS--KPE-VTVVRLNVHKKVVLTLQDKI--VKEKFAVAPDVOIE--GKGTILISSEGETE-NMPLTISDF-NVSDCSRRCEDF : 82
Hsa : CYVCS--KPE-VTVVRLNVHKKVVLTLQDKI--VKEKFAVAPDVOIE--GKGTILISSEGETE-NMPLTISDF-NVSDCSRRCEDF : 82
Mlu a : CYVCS--KPE-VTVVRLNVHKKVVLTLQDKI--VKEKFAVAPDVOIE--GKGTILISSEGETE-NMPLTISDF-NVSDCSRRCEDF : 82
Ocu : CYVCS--KPE-VTVVRLNVHKKVVLTLQDKI--VKEKFAVAPDVOIE--GKGTILISSEGETE-NMPLTISDF-NVSDCSRRCEDF : 82
Bta : CYVCS--KPE-VTVVRLNVHKKVVLTLQDKI--VKEKFAVAPDVOIE--GKGTILISSEGETE-NMPLTISDF-NVSDCSRRCEDF : 82
Amel : CYVCS--KPE-VTVVRLNVHKKVVLTLQDKI--VKEKFAVAPDVOIE--GKGTILISSEGETE-NMPLTISDF-NVSDCSRRCEDF : 82
Mpu : CYVCS--KPE-VTVVRLNVHKKVVLTLQDKI--VKEKFAVAPDVOIE--GKGTILISSEGETE-NMPLTISDF-NVSDCSRRCEDF : 82
Eca : CYVCS--KPE-VTVVRLNVHKKVVLTLQDKI--VKEKFAVAPDVOIE--GKGTILISSEGETE-NMPLTISDF-NVSDCSRRCEDF : 82
Fca : CYVCS--KPE-VTVVRLNVHKKVVLTLQDKI--VKEKFAVAPDVOIE--GKGTILISSEGETE-NMPLTISDF-NVSDCSRRCEDF : 82
Cpo : CYVCS--KPE-VTVVRLNVHKKVVLTLQDKI--VKEKFAVAPDVOIE--GKGTILISSEGETE-NMPLTISDF-NVSDCSRRCEDF : 82
Nle : CYVCS--KPE-VTVVRLNVHKKVVLTLQDKI--VKEKFAVAPDVOIE--GKGTILISSEGETE-NMPLTISDF-NVSDCSRRCEDF : 82
Cjac : CYVCS--KPE-VTVVRLNVHKKVVLTLQDKI--VKEKFAVAPDVOIE--GKGTILISSEGETE-NMPLTISDF-NVSDCSRRCEDF : 82
Ptr : CYVCS--KPE-VTVVRLNVHKKVVLTLQDKI--VKEKFAVAPDVOIE--GKGTILISSEGETE-NMPLTISDF-NVSDCSRRCEDF : 82
Mmul : CYVCS--KPE-VTVVRLNVHKKVVLTLQDKI--VKEKFAVAPDVOIE--GKGTILISSEGETE-NMPLTISDF-NVSDCSRRCEDF : 82
Clu : CYVCS--KPE-VTVVRLNVHKKVVLTLQDKI--VKEKFAVAPDVOIE--GKGTILISSEGETE-NMPLTISDF-NVSDCSRRCEDF : 82
Gga : CYVCS--KPE-VTVVRLNVHKKVVLTLQDKI--VKEKFAVAPDVOIE--GKGTILISSEGETE-NMPLTISDF-NVSDCSRRCEDF : 82
Mga : CYVCS--KPE-VTVVRLNVHKKVVLTLQDKI--VKEKFAVAPDVOIE--GKGTILISSEGETE-NMPLTISDF-NVSDCSRRCEDF : 82
Psi : CYVCS--KPE-VTVVRLNVHKKVVLTLQDKI--VKEKFAVAPDVOIE--GKGTILISSEGETE-NMPLTISDF-NVSDCSRRCEDF : 82
Mdo : CYVCS--KPE-VTVVRLNVHKKVVLTLQDKI--VKEKFAVAPDVOIE--GKGTILISSEGETE-NMPLTISDF-NVSDCSRRCEDF : 82
Sha : CYVCS--KPE-VTVVRLNVHKKVVLTLQDKI--VKEKFAVAPDVOIE--GKGTILISSEGETE-NMPLTISDF-NVSDCSRRCEDF : 82
Dre : CYVCS--KPE-VTVVRLNVHKKVVLTLQDKI--VKEKFAVAPDVOIE--GKGTILISSEGETE-NMPLTISDF-NVSDCSRRCEDF : 82
Gmo : CYVCS--RPE-VTVVRLNVHKKVVLTLQDKI--VKEKFAVAPDVOIE--GKGTILISSEGETE-NMPLTISDF-NVSDCSRRCEDF : 82
Oni : CYVCS--KPE-VTVVRLNVHKKVVLTLQDKI--VKEKFAVAPDVOIE--GKGTILISSEGETE-NMPLTISDF-NVSDCSRRCEDF : 82
Tni : CYVCS--KPE-VTVVRLNVHKKVVLTLQDKI--VKEKFAVAPDVOIE--GKGTILISSEGETE-NMPLTISDF-NVSDCSRRCEDF : 82
Tru : CYVCS--KPE-VTVVRLNVHKKVVLTLQDKI--VKEKFAVAPDVOIE--GKGTILISSEGETE-NMPLTISDF-NVSDCSRRCEDF : 82
Gac : CYVCS--QPE-VTVVRLNVHKKVVLTLQDKI--VKEKFAVAPDVOIE--GKGTILISSEGETE-NMPLTISDF-NVSDCSRRCEDF : 82
Ola : CYVCS--KPE-VTVVRLNVHKKVVLTLQDKI--VKEKFAVAPDVOIE--GKGTILISSEGETE-NMPLTISDF-NVSDCSRRCEDF : 82
Xma : CYVCS--KPE-VTVVRLNVHKKVVLTLQDKI--VKEKFAVAPDVOIE--GKGTILISSEGETE-NMPLTISDF-NVSDCSRRCEDF : 82
Hme : CYVCS--KPE-VTVVRLNVHKKVVLTLQDKI--VKEKFAVAPDVOIE--GKGTILISSEGETE-NMPLTISDF-NVSDCSRRCEDF : 82
Bmo : CYVCS--KPE-VTVVRLNVHKKVVLTLQDKI--VKEKFAVAPDVOIE--GKGTILISSEGETE-NMPLTISDF-NVSDCSRRCEDF : 82
Dpl : CYVCS--KPE-VTVVRLNVHKKVVLTLQDKI--VKEKFAVAPDVOIE--GKGTILISSEGETE-NMPLTISDF-NVSDCSRRCEDF : 82
Tca : CYVCS--KPE-VTVVRLNVHKKVVLTLQDKI--VKEKFAVAPDVOIE--GKGTILISSEGETE-NMPLTISDF-NVSDCSRRCEDF : 82
Phu : CFCSE---KPE-VTVVRLNVHKKVVLTLQDKI--VKEKFAVAPDVOIE--GKGTILISSEGETE-NMPLTISDF-NVSDCSRRCEDF : 81
Dps : CYVCS--DPA-IITLRIDTKRVHKEIRDDV--LIKTILNLPDVTV--VGSNLSISSEGETE-NMPLTISDF-NVSDCSRRCEDF : 81
Dwi : CYVCS--DPA-IITLRIDTKRVHKEIRDDV--LIKTILNLPDVTV--VGSNLSISSEGETE-NMPLTISDF-NVSDCSRRCEDF : 81
Dgr : CYVCS--DPA-IITLRIDTKRVHKEIRDDV--LIKTILNLPDVTV--VGSNLSISSEGETE-NMPLTISDF-NVSDCSRRCEDF : 81
Dvi : CYVCS--DPA-IITLRIDTKRVHKEIRDDV--LIKTILNLPDVTV--VGSNLSISSEGETE-NMPLTISDF-NVSDCSRRCEDF : 81
Nan : CYVCS--DPA-IITLRIDTKRVHKEIRDDV--LIKTILNLPDVTV--VGSNLSISSEGETE-NMPLTISDF-NVSDCSRRCEDF : 81
Dme a : CHVCS--DPA-IITLRIDTKRVHKEIRDDV--LIKTILNLPDVTV--VGSNLSISSEGETE-NMPLTISDF-NVSDCSRRCEDF : 81
Dya a : CYVCS--DPA-IITLRIDTKRVHKEIRDDV--LIKTILNLPDVTV--VGSNLSISSEGETE-NMPLTISDF-NVSDCSRRCEDF : 81
Aga : CYVCS--KPE-VTVVRLNVHKKVVLTLQDKI--VKEKFAVAPDVOIE--GKGTILISSEGETE-NMPLTISDF-NVSDCSRRCEDF : 81
Aae : CYVCS--KPE-VTVVRLNVHKKVVLTLQDKI--VKEKFAVAPDVOIE--GKGTILISSEGETE-NMPLTISDF-NVSDCSRRCEDF : 81
Cqu : CYVCS--KPE-VTVVRLNVHKKVVLTLQDKI--VKEKFAVAPDVOIE--GKGTILISSEGETE-NMPLTISDF-NVSDCSRRCEDF : 81
Nvi : CYVCS--KPE-VTVVRLNVHKKVVLTLQDKI--VKEKFAVAPDVOIE--GKGTILISSEGETE-NMPLTISDF-NVSDCSRRCEDF : 81
Ace : CYVCS--KPE-VTVVRLNVHKKVVLTLQDKI--VKEKFAVAPDVOIE--GKGTILISSEGETE-NMPLTISDF-NVSDCSRRCEDF : 81
Ame : CYVCS--KPE-VTVVRLNVHKKVVLTLQDKI--VKEKFAVAPDVOIE--GKGTILISSEGETE-NMPLTISDF-NVSDCSRRCEDF : 81
Sst : CPSSSL---LSR-GIMNLTNQELQENTLRWLVDLVEKKGYYEDGLSI-IVGKSRVYDVFDD---NIDSSISELGGFDLVLQDDE : 82
Lel : CPTEAG---TAR-GVFKVRDSDMGNLTLNWLLEQLKVSYGSRSISI-QAGKMLIYDVFDD---YVEAKIKVDPGFQNALILQDDE : 82
Mgu b : CPAESL---SAR-GILHVSQKDAP--TLGQLVEIKKKYGY--EIAL-ILGKAKLIYDVFDD---NDRSVLEVAGFVSGELLQVQDD : 78
Cdu : CASDSL---TAR-GVVTISIDDLVLTLDGFIKLDKADSYGIKLSISI-QIGKSLIYDVFDD---YLOTKIKVDPGFQNALILQDDE : 82
Ctr : CASDSL---TSR-AVLRISNDLRLITLGLVDFEYKGYNKEISISI-QLGKSLIYDVFDD---HLDPLNKVDPGFQNALILQDDE : 82
Kla : CSVSSN---IQR-AVLKIPKAIVEHMSLYDLNQIKISKYEFTGEYSVL--TNTNSLYDVFDD---LECRKISRNFNRTGTFLLYKDE : 81
Cgla : CAVCSH---VIR-GVFKVRDSDMGNLTLNWLLEQLKVSYGSRSISI-QAGKMLIYDVFDD---YVEAKIKVDPGFQNALILQDDE : 81
Ecy : CPVCSH---YQR-VTITLNVQESWQSMKGLDILIKIRDRYGFSEMSVM--MTSNR-LADDFD---LYSQTLOGLNINTITLAVSDS : 81
Ego : CSVCAH---YQR-CALTVGAVRCKTLTIGELIEAVQEKYGFSEVSVV--TSTNR-LADDFD---LNGNTIEKLELRTGTFLLYKDE : 81
Lth : CPVCSH---IAR-GVLTLSQNDLDMRSELVGAIVQEKYGFSEVSVV--KSTQR-LADDFD---LLNLTAEV-KVARTITLISDE : 80
Tph : CSVCSM---VVR-GILKVSTEKLTKLIDLITLAKTYGTLISVIV--TKDQR-LADDFD---LYE-STHDL-QSDSITLISDE : 81
Vpo : CAVCSK---VCR-GVLEVSTVKLQSTIGELIELIRTTFKYPNDVSVL--VSRQR-LADDFD---LLD-TIEDL-KLGEQDVLFTDD : 81
Nca : CAVCSK---VTR-GVLSINDMNIIGELIEGK--LREKYGFSEDISLL--SSEQR-LADDFD---LLDRSTKVD-NLRNCSVILLTDE : 78
Nda : CAVCSK---VTR-GVIVISDPTILKEFIAE--LRSKYGFSEDISLL--LSEQR-LADDFD---MVDRTSDV-NLRNCSVILLTDE : 78
Sce : CPVCSK---VCR-GVILKSSDCLNKMKLSDFVVLIREKYSYPODISLL--ASNQR-LADDFD---LNDRTLSEI-NLGNCSVILLTDE : 81
Tde : CPVCSK---VCR-GVILKTEKGLNEINISKLIDFIREKYSYPODISLL--TSNQR-LADDFD---LECTIADC-KLHAGSVVLFSD : 81
Zro : CAVCSK---VAR-GVVKITEKGLKLTLSQIDLLKKNYNSPSTSLI--TSDQR-LADDFD---LLDRTLSQA-KLHAGSVVLFSD : 81

|       | 100            | *                      | 120                    | *                           | 140                 | *              |       |
|-------|----------------|------------------------|------------------------|-----------------------------|---------------------|----------------|-------|
| Api   | : H NFR        | -----VKIIA             | -----YDKE              | -----KSGEEDLD               | -----EILNN          | -----          | : 107 |
| Cbri  | : M DFG        | -----VKVVF             | -----CKNS              | -----NFRGDQ                 | -----EIVRE          | -----          | : 106 |
| Chr   | : M ELE        | -----KLFY              | -----RSAD              | -----HLKGDQ                 | -----EVARE          | -----          | : 108 |
| Cre   | : M DMV        | -----KLFY              | -----RRAN              | -----HLRGDN                 | -----EIARS          | -----          | : 106 |
| Cel   | : Q EME        | -----IKLFI             | -----KKGD              | -----RLAGDD                 | -----EVARS          | -----          | : 106 |
| Cjap  | : Q DMV        | -----KLFY              | -----RRQN              | -----DLKGE                  | -----KILRE          | -----          | : 106 |
| Sma   | : R DFT        | -----IRLILSCISVELANKLP | -----TSDLSTLNLNLSSRLEE | -----QLTSEELQSET            | -----TWIRVGD        | -----          | : 142 |
| Cin   | : L N D        | -----IVVNI             | -----LHSE              | -----N LPDDMI               | -----QVSET          | -----          | : 110 |
| Dpu   | : H E D        | -----NITI              | -----AHRD              | -----Q LEDNRE               | -----SIAD           | -----          | : 109 |
| Hma   | : L NFE        | -----IAITL             | -----RDKK              | -----D INVQD                | -----FLEGE          | -----          | : 109 |
| Aqu   | : L N Q        | -----ILNL              | -----FHSD              | -----EALSDEKE               | -----EVIDS          | -----          | : 110 |
| Nve   | : L N E        | -----VINI              | -----KHRT              | -----D LETDQ                | -----EVEGD          | -----          | : 110 |
| Lcha  | : L D T        | -----LINV              | -----LNSE              | -----D LEKDVE               | -----EUVGD          | -----          | : 109 |
| Aca   | : L D T        | -----LINV              | -----LHCE              | -----E LAKDVE               | -----EUVGD          | -----          | : 109 |
| Tgu a | : L D T        | -----LINV              | -----LHSE              | -----D LEKDVE               | -----EUVGD          | -----          | : 109 |
| Mlu b | : L D T        | -----LINI              | -----LHSE              | -----D LGKDIE               | -----EUVGD          | -----          | : 109 |
| Oan   | : L D T        | -----LINL              | -----LHSE              | -----D LGKDVE               | -----EUVGD          | -----          | : 109 |
| Pca   | : L D T        | -----LINI              | -----LHSE              | -----D LGKDVE               | -----EUVGD          | -----          | : 109 |
| Mmus  | : L D T        | -----LINI              | -----LHSE              | -----D LGKDVE               | -----EUVGD          | -----          | : 109 |
| Rno   | : L D T        | -----LINI              | -----LHSE              | -----D LGKDVE               | -----EUVGD          | -----          | : 109 |
| Itr   | : L D T        | -----LINI              | -----LHSE              | -----D LEKDVE               | -----EUVGD          | -----          | : 109 |
| Oga   | : L D T        | -----LINI              | -----LHSE              | -----D LGKDVE               | -----EUVGD          | -----          | : 109 |
| Laf a | : L D T        | -----LINI              | -----LHSE              | -----D LAKDVE               | -----EUVGD          | -----          | : 109 |
| Hsa   | : L D T        | -----LINI              | -----LHSE              | -----D LGKDVE               | -----EUVGD          | -----          | : 109 |
| Mlu a | : L D T        | -----LINI              | -----LHSE              | -----D LGKDVE               | -----EUVGD          | -----          | : 109 |
| Ocu   | : L D T        | -----LINI              | -----LHSE              | -----D LGKDVE               | -----EUVGD          | -----          | : 109 |
| Bta   | : L D T        | -----LINI              | -----LHSE              | -----D LGKDVE               | -----EUVGD          | -----          | : 109 |
| Amel  | : L D T        | -----LINI              | -----LHSE              | -----D LGKDVE               | -----EUVGD          | -----          | : 109 |
| Mpu   | : L D T        | -----LINI              | -----LHSE              | -----D LGKDVE               | -----EUVGD          | -----          | : 109 |
| Eca   | : L D T        | -----LINI              | -----LHSE              | -----D LGKDVE               | -----EUVGD          | -----          | : 109 |
| Fca   | : L D T        | -----LINI              | -----LHSE              | -----D LGKDVE               | -----EUVGD          | -----          | : 109 |
| Cpo   | : L D T        | -----LINI              | -----LHSE              | -----D LGKDVE               | -----EUVGD          | -----          | : 109 |
| Nle   | : L D T        | -----LINI              | -----LHSE              | -----D LGKDVE               | -----EUVGD          | -----          | : 109 |
| Cjac  | : L D T        | -----LINI              | -----LHSE              | -----D LGKDVE               | -----EUVGD          | -----          | : 109 |
| Ptr   | : L D T        | -----LINI              | -----LHSE              | -----D LGKDVE               | -----EUVGD          | -----          | : 109 |
| Mmul  | : L D T        | -----LINI              | -----LHSE              | -----D LGKDVE               | -----EUVGD          | -----          | : 109 |
| Clu   | : L D T        | -----LINI              | -----LHSE              | -----D LGKDIE               | -----EUVGD          | -----          | : 109 |
| Gga   | : L D T        | -----LINV              | -----LHSE              | -----D LEKDVE               | -----EUVGD          | -----          | : 109 |
| Mga   | : L D T        | -----LINV              | -----LHSE              | -----D LEKDVE               | -----EUVGD          | -----          | : 109 |
| Psi   | : L D T        | -----LINV              | -----LHSE              | -----D LEKDVE               | -----EUVGD          | -----          | : 109 |
| Mdo   | : L D T        | -----LINV              | -----LHSD              | -----D LEKDVE               | -----EUVGD          | -----          | : 109 |
| Sha   | : L D T        | -----LINV              | -----LHSD              | -----D LEKDVE               | -----EUVGD          | -----          | : 109 |
| Dre   | : L D T        | -----LVNV              | -----IHSE              | -----E LEKDVE               | -----EUVGD          | -----          | : 109 |
| Gmo   | : L D T        | -----LINV              | -----LHAE              | -----D LEKDVE               | -----EUVGD          | -----          | : 109 |
| Oni   | : L D T        | -----LINV              | -----LHVE              | -----D LERDVE               | -----EUVGE          | -----          | : 109 |
| Tni   | : L D T        | -----LVNV              | -----LHTE              | -----E LERDVE               | -----EUVGE          | -----          | : 109 |
| Tru   | : L D T        | -----LVNV              | -----LHTE              | -----E LERDVE               | -----EUVGD          | -----          | : 109 |
| Gac   | : L D A        | -----LVNV              | -----LHTE              | -----E LERDVE               | -----EUVGE          | -----          | : 109 |
| Ola   | : L D T        | -----LINV              | -----LHTE              | -----E LERDVE               | -----EUVGE          | -----          | : 109 |
| Xma   | : L D T        | -----LINV              | -----LHTE              | -----E LERDVE               | -----EUVGE          | -----          | : 109 |
| Hme   | : L N E        | -----VRVRL             | -----QQDD              | -----DEKSWKLITD             | -----               | -----          | : 104 |
| Bmo   | : L N E        | -----VRVRL             | -----QQED              | -----EENSRLVTD              | -----               | -----          | : 104 |
| Dpl   | : L N E        | -----VRVRL             | -----QQED              | -----EKTWRLVTD              | -----               | -----          | : 104 |
| Tca   | : L N E        | -----IINV              | -----NQYE              | -----AKEKDPP                | -----KFIAN          | -----          | : 109 |
| Phu   | : L N E        | -----TVYV              | -----NHYE              | -----APKDEPD                | -----KIAD           | -----          | : 108 |
| Dps   | : H N S        | -----SVII              | -----SHFD              | -----A ERDSDL               | -----EVSAD          | -----          | : 108 |
| Dwi   | : H N K        | -----RIII              | -----NHFD              | -----A DREDNL               | -----EUVAD          | -----          | : 108 |
| Dgr   | : F N E        | -----SIII              | -----AHFD              | -----A EREDVL               | -----EVIAD          | -----          | : 108 |
| Dvi   | : F S E        | -----SIII              | -----AHFD              | -----A DREDVL               | -----EVIAD          | -----          | : 108 |
| Nan   | : F N E        | -----SIII              | -----SHFD              | -----S ERDEAV               | -----EUVAD          | -----          | : 108 |
| Dme a | : F N E        | -----SIII              | -----SHFD              | -----A ERDENL               | -----EUVAD          | -----          | : 108 |
| Dya a | : F N E        | -----SIII              | -----SHFD              | -----A ERDENL               | -----EUVAD          | -----          | : 108 |
| Aga   | : L N E        | -----SITV              | -----LHKE              | -----A GREEAP               | -----EIVAD          | -----          | : 108 |
| Aae   | : V N E        | -----TFTV              | -----IHKD              | -----P GRDESS               | -----DIVAD          | -----          | : 108 |
| Cqu   | : V N E        | -----TFTI              | -----VHKD              | -----P ARDEPS               | -----DIVAD          | -----          | : 108 |
| Nvi   | : L N S        | -----KVTV              | -----VHRE              | -----KPLPNSDEPE             | -----VITAD          | -----          | : 111 |
| Ace   | : Q N S        | -----TVYI              | -----VYREKDPK          | -----DQDSPO                 | -----LILAD          | -----          | : 112 |
| Ame   | : Q N S        | -----TITI              | -----IYRE              | -----RPSLKGDSPD             | -----LILAD          | -----          | : 111 |
| Sst   | : NDELE        | -----N ELYI            | -----                  | -----TVVN                   | -----EPTTEK         | -----          | : 103 |
| Lel   | : DDLE         | -----K ELLI            | -----                  | -----NVVDPGPEGDYNGIVLTKLPSV | -----               | -----          | : 115 |
| Mgu b | : NDELE        | -----N EFYI            | -----                  | -----SLGD                   | -----KNE            | -----          | : 96  |
| Mgu   | : NDELE        | -----N EFYI            | -----                  | -----SLGD                   | -----KNE            | -----          | : 96  |
| Cdu   | : ADELE        | -----N ELYL            | -----                  | -----NIKD                   | -----DTVE           | -----R         | : 103 |
| Ctr   | : DDQLE        | -----N QLYL            | -----                  | -----SIVD                   | -----EQCDLELPLKLR   | -----          | : 110 |
| Kla   | : EMEDG        | -----AQLRQSIEFYI       | -----                  | -----EFVP                   | -----ENSGEDLQLPNLPD | -----          | : 116 |
| Cgla  | : EEEAG        | -----LTKQIMEYYI        | -----                  | -----EISD                   | -----ESEDKIEQLSLPQI | -----          | : 114 |
| Ecy   | : ISKED        | -----D TVRKPIEFYL      | -----                  | -----ELDN                   | -----LVNEID         | -----          | : 107 |
| Ego   | : VPSEEDN      | -----TVRKPIEFYL        | -----                  | -----ELSD                   | -----SATG           | -----ELIE      | : 111 |
| Lth   | : QDSEE        | -----SIRAPVELYI        | -----                  | -----EQGE                   | -----PEGINLPDIE     | -----          | : 109 |
| Tph   | : EDEND        | -----MVRKSMELYI        | -----                  | -----DVVDK                  | -----STATNLIELPKID  | -----          | : 114 |
| Vpo   | : EGDSDSNQFRKS | -----ELYI              | -----                  | -----AVVS                   | -----DKSDDYIKLPSIE  | -----          | : 115 |
| Nca   | : EGNEETGMVRKP | -----ELYI              | -----                  | -----NVTD                   | -----DNSIKLTLPPID   | -----          | : 111 |
| Nda   | : EENDA        | -----GMCRRK            | -----ELYL              | -----ELRN                   | -----EISGQNI        | -----PKIILPELD | : 114 |
| Sce   | : EGDTM        | -----IRKAIELFL         | -----                  | -----DVDD                   | -----ELPCNTCSLPDVE  | -----          | : 112 |
| Tde   | : EGVGD        | -----GSYRKAIELYI       | -----                  | -----ETVK                   | -----GPLENEINLPDVV  | -----          | : 114 |
| Zro   | : EGDES        | -----EMVRKP            | -----EYI               | -----DVVE                   | -----ESAINSEIELPALE | -----          | : 115 |

**Supplementary Figure S3. Protein sequence alignment of the Sae2 UFD domain from metazoa and Saccharomycetales.** Human Sae2 homolog sequences were retrieved from EggNOG database. After removal of incomplete sequences or sequences exceeding in length, 86 sequences were retained. Selected sequences were aligned using MUSCLE at EMBL-EBI. The sequence alignment fragment corresponding to the LHEB2 domain is enclosed in a red rectangle. Residue shading correspond to 90% (white letter and dark background), 70% (white letter and gray background), and 50% (black letter and light gray background) of sequence identity.

| Phylum          | Symbol | Sequence code                  | Species                                                                           |
|-----------------|--------|--------------------------------|-----------------------------------------------------------------------------------|
| Arthropoda      | Aae    | >7159.AAEL010641-PA            | <i>Aedes aegypti</i> (yellow fever mosquito), species, mosquitos                  |
| Arthropoda      | Ace    | >12957.ACEP_00011683-PA        | <i>Atta cephalotes</i> (Leafcutter ant)                                           |
| Arthropoda      | Ag     | >7165.AGAP008637-PA            | <i>Anopheles gambiae</i> (African malaria mosquito), species, mosquitos           |
| Arthropoda      | Ame    | >7460.GB12173-PA               | <i>Apis mellifera</i> (honey bee), species, bees                                  |
| Arthropoda      | Api    | >7029.ACYP1006138-PA           | <i>Acyrtosiphon pisum</i> (pea aphid), species, aphids                            |
| Arthropoda      | Cqu    | >7176.CPJJ007700-PA            | <i>Culex quinquefasciatus</i> (southern house mosquito), species, mosquitos       |
| Arthropoda      | Dgr    | >7222.FBpp0149193              | <i>Drosophila grimshawi</i> (species, flies)                                      |
| Arthropoda      | Dme_a  | >7227.FBpp0076457              | <i>Drosophila melanogaster</i> (fruit fly), species, flies                        |
| Arthropoda      | Dpl    | >13037.EHJ64540                | <i>Danaus plexippus</i> (Monarch butterfly)                                       |
| Arthropoda      | Dps    | >7237.FBpp0276753              | <i>Drosophila pseudoobscura</i> (species, flies)                                  |
| Arthropoda      | Dpu    | >6669.DappuP300104             | <i>Daphnia pulex</i> (common water flea), species, crustaceans                    |
| Arthropoda      | Dvi    | >7244.FBpp0226639              | <i>Drosophila virilis</i> (species, flies)                                        |
| Arthropoda      | Dwi    | >7260.FBpp0249132              | <i>Drosophila willistoni</i> (species, flies)                                     |
| Arthropoda      | Dya_a  | >7245.FBpp0265382              | <i>Drosophila yakuba</i> (species, flies)                                         |
| Arthropoda      | Dan    | >7217.FBpp0113673              | <i>Drosophila ananassae</i> (species, flies)                                      |
| Arthropoda      | Tca    | >7070.TCO02294-PA              | <i>Tribolium castaneum</i> (red flour beetle), species, beetles                   |
| Arthropoda      | Bmo    | >7091.BGIBMGA012116-TA         | <i>Bombyx mori</i> (domestic silkworm), species, moths                            |
| Arthropoda      | Hme    | >34740.HMEL017289-PA           | <i>Heliconius melpomene</i>                                                       |
| Arthropoda      | Nvi    | >7425.NV10104-PA               | <i>Nasonia vitripennis</i> (jewel wasp), species, wasps &c                        |
| Arthropoda      | Phu    | >121225.PHUM280660-PA          | <i>Pediculus humanus</i>                                                          |
| Chordata        | Aca    | >28377.ENSACAP00000001485      | <i>Anolis carolinensis</i> (Green anole) (American chameleon)                     |
| Chordata        | Ame1   | >9646.ENSAMEP000000017826      | <i>Ailuropoda melanoleuca</i> (giant panda), species, carnivores                  |
| Chordata        | Bta    | >9913.ENSBTAP000000003333      | <i>Bos taurus</i> (cattle), species, even-toed ungulates                          |
| Chordata        | Cjac   | >9483.ENSJCJAP000000020075     | <i>Callithrix jacchus</i> (white-tufted-ear marmoset), species, primates          |
| Chordata        | Clu    | >9615.ENSJCAF000000010792      | <i>Canis lupus familiaris</i> (dog), subspecies, carnivores                       |
| Chordata        | Cpo    | >10141.ENSJCP000000009465      | <i>Cavia porcellus</i> (Guinea pig)                                               |
| Chordata        | Dre    | >7955.ENSJARP0000000102182     | <i>Danio rerio</i> (zebrafish), species, bony fishes                              |
| Chordata        | Eca    | >9796.ENSECAP000000000109      | <i>Equus caballus</i> (horse), species, odd-toed ungulates                        |
| Chordata        | Fca    | >9685.ENSJFCA0000000020786     | <i>Felis catus</i> (domestic cat), species, carnivores                            |
| Chordata        | Gac    | >69293.ENSJGAC000000004237     | <i>Gasterosteus aculeatus</i> (three-spined stickleback), species, bony fishes    |
| Chordata        | Gga    | >9031.ENSJGALP0000000038520    | <i>Gallus gallus</i> (chicken), species, birds                                    |
| Chordata        | Gmo    | >8049.ENSJMOP000000004426      | <i>Gadus morhua</i> (Atlantic cod), species, bony fishes                          |
| Chordata        | Hsa    | >9606.ENSJHSP0000000246548     | <i>Homo sapiens</i>                                                               |
| Chordata        | Itr    | >43179.ENSJSTP0000000002332    | <i>Ictidomys tridecemlineatus</i> (thirteen-lined ground squirrel), species, rode |
| Chordata        | Laf_a  | >9785.ENSJLAFP0000000011542    | <i>Loxodonta africana</i> (African savanna elephant), species, placentals         |
| Chordata        | Mga    | >9103.ENSJMGAP000000006132     | <i>Meleagris gallopavo</i> (turkey), species, birds                               |
| Chordata        | Mlu_a  | >59463.ENSJMLUP000000002773    | <i>Myotis lucifugus</i> (little brown bat), species, bats                         |
| Chordata        | Mlu_b  | >59463.ENSJMLUP0000000018571   | <i>Myotis lucifugus</i> (little brown bat), species, bats                         |
| Chordata        | Mmul   | >9544.ENSJMUP000000007742      | <i>Macaca mulatta</i> (Rhesus monkey), species, primates                          |
| Chordata        | Mmus   | >10090.ENSJMUSP0000000099807   | <i>Mus musculus</i>                                                               |
| Chordata        | Mpu    | >9669.ENSJMUP0000000007408     | <i>Mustela putorius furo</i> (domestic ferret), subspecies, carnivores            |
| Chordata        | Nle    | >61853.ENSJNLEP0000000013124   | <i>Nomascus leucogenys</i> (northern white-cheeked gibbon), species, primates     |
| Chordata        | Ocu    | >9986.ENSJOCUP0000000001260    | <i>Oryctolagus cuniculus</i> (rabbit), species, rabbits & hares                   |
| Chordata        | Ola    | >8090.ENSJORLP0000000015752    | <i>Oryzias latipes</i> (Japanese medaka), species, bony fishes                    |
| Chordata        | Oni    | >8128.ENSJONIP0000000013939    | <i>Oreochromis niloticus</i> (Nile tilapia), species, bony fishes                 |
| Chordata        | Pca    | >9813.ENSJPCAP0000000009534    | <i>Procavia capensis</i> (Cape rock hyrax), species, placentals                   |
| Chordata        | Ptr    | >9598.ENSJPTRP0000000018512    | <i>Pan troglodytes</i> (chimpanzee), species, primates                            |
| Chordata        | Rno    | >10116.ENSJRNOP0000000028672   | <i>Rattus norvegicus</i>                                                          |
| Chordata        | Sha    | >9305.ENSJSHAP0000000002779    | <i>Sarcophilus harrisi</i> (Tasmanian devil), species, marsupials                 |
| Chordata        | Tgu_a  | >59729.ENSJTGUP000000009909    | <i>Taeniopygia guttata</i> (zebra finch), species, birds                          |
| Chordata        | Tni    | >99883.ENSJTNP0000000005165    | <i>Tetraodon nigroviridis</i> (spotted green pufferfish), species, bony fishes    |
| Chordata        | Xma    | >8083.ENSJXMAP0000000016139    | <i>Xiphophorus maculatus</i> (southern platyfish), species, bony fishes           |
| Chordata        | Cin    | >7719.ENSJCINP0000000030774    | <i>Ciona intestinalis</i> (vase tunicate), species, tunicates                     |
| Chordata        | Lcha   | >7897.ENSJLACP000000007856     | <i>Latimeria chalumnae</i> (coelacanth), species, coelacanths                     |
| Chordata        | Mdo    | >13616.ENSJMODP0000000014955   | <i>Monodelphis domestica</i>                                                      |
| Chordata        | Oan    | >9258.ENSJOANP0000000015209    | <i>Ornithorhynchus anatinus</i> (platypus), species, monotremes                   |
| Chordata        | Oga    | >30611.ENSJOGAP000000007933    | <i>Otolemur garnettii</i> (Small-eared galago) (Garnett's greater bushbaby)       |
| Chordata        | Psi    | >13735.ENSJPSIP0000000010107   | <i>Pelodiscus sinensis</i>                                                        |
| Chordata        | Tru    | >31033.ENSJTRUP0000000016721   | <i>Takifugu rubripes</i> (Japanese pufferfish) (Fugu rubripes)                    |
| Cnidaria        | Nve    | >45351.NEMVEDRAFT_vlg161397-PA | <i>Nematostella vectensis</i> (starlet sea anemone), species, sea anemones        |
| Cnidaria        | Hma    | >6085.XP_002165708             | <i>Hydra magnipapillata</i>                                                       |
| Nematoda        | Cbr    | >135651.CBN10217               | <i>Caenorhabditis brenneri</i> (Nematode worm)                                    |
| Nematoda        | Cbri   | >6238.CBG13604                 | <i>Caenorhabditis briggsae</i> (nematodes)                                        |
| Nematoda        | Cel    | >6239.W02A11.4                 | <i>Caenorhabditis elegans</i> (roundworm), species, nematodes                     |
| Nematoda        | Cjap   | >281687.CJA09929               | <i>Caenorhabditis japonica</i>                                                    |
| Nematoda        | Cre    | >31234.CRE28085                | <i>Caenorhabditis remanei</i> ( <i>Caenorhabditis vulgaris</i> )                  |
| Platyhelminthes | Sma    | >6183.Smp_166220_mRNA          | <i>Schistosoma mansoni</i> (flatworms)                                            |
| Porifera        | Aqu    | >400682.PAC_15728046           | <i>Amphimedon queenslandica</i> (species, sponges)                                |

**Supplementary Table S1.** Phylum, symbol, sequence code and species used in the alignment of the Sae2 UFD domain from metazoa.
